# Supplementary material
Source: PubMed Central journal article supplement (PMC6188972)

*Ambio*

Electronic Supplementary Material

Title: Detecting crucial dispersal pathways using a virtual ecology approach: A case study of the mirid bug *Stenotus rubrovittatus*

Takeshi Osawa, Kazuhisa Yamasaki, Ken Tabuchi, Akira Yoshioka, Mayura B. Takada

Fig. S1. Schematic showing the workflow of the study, from data collection to model simulation to model validation.

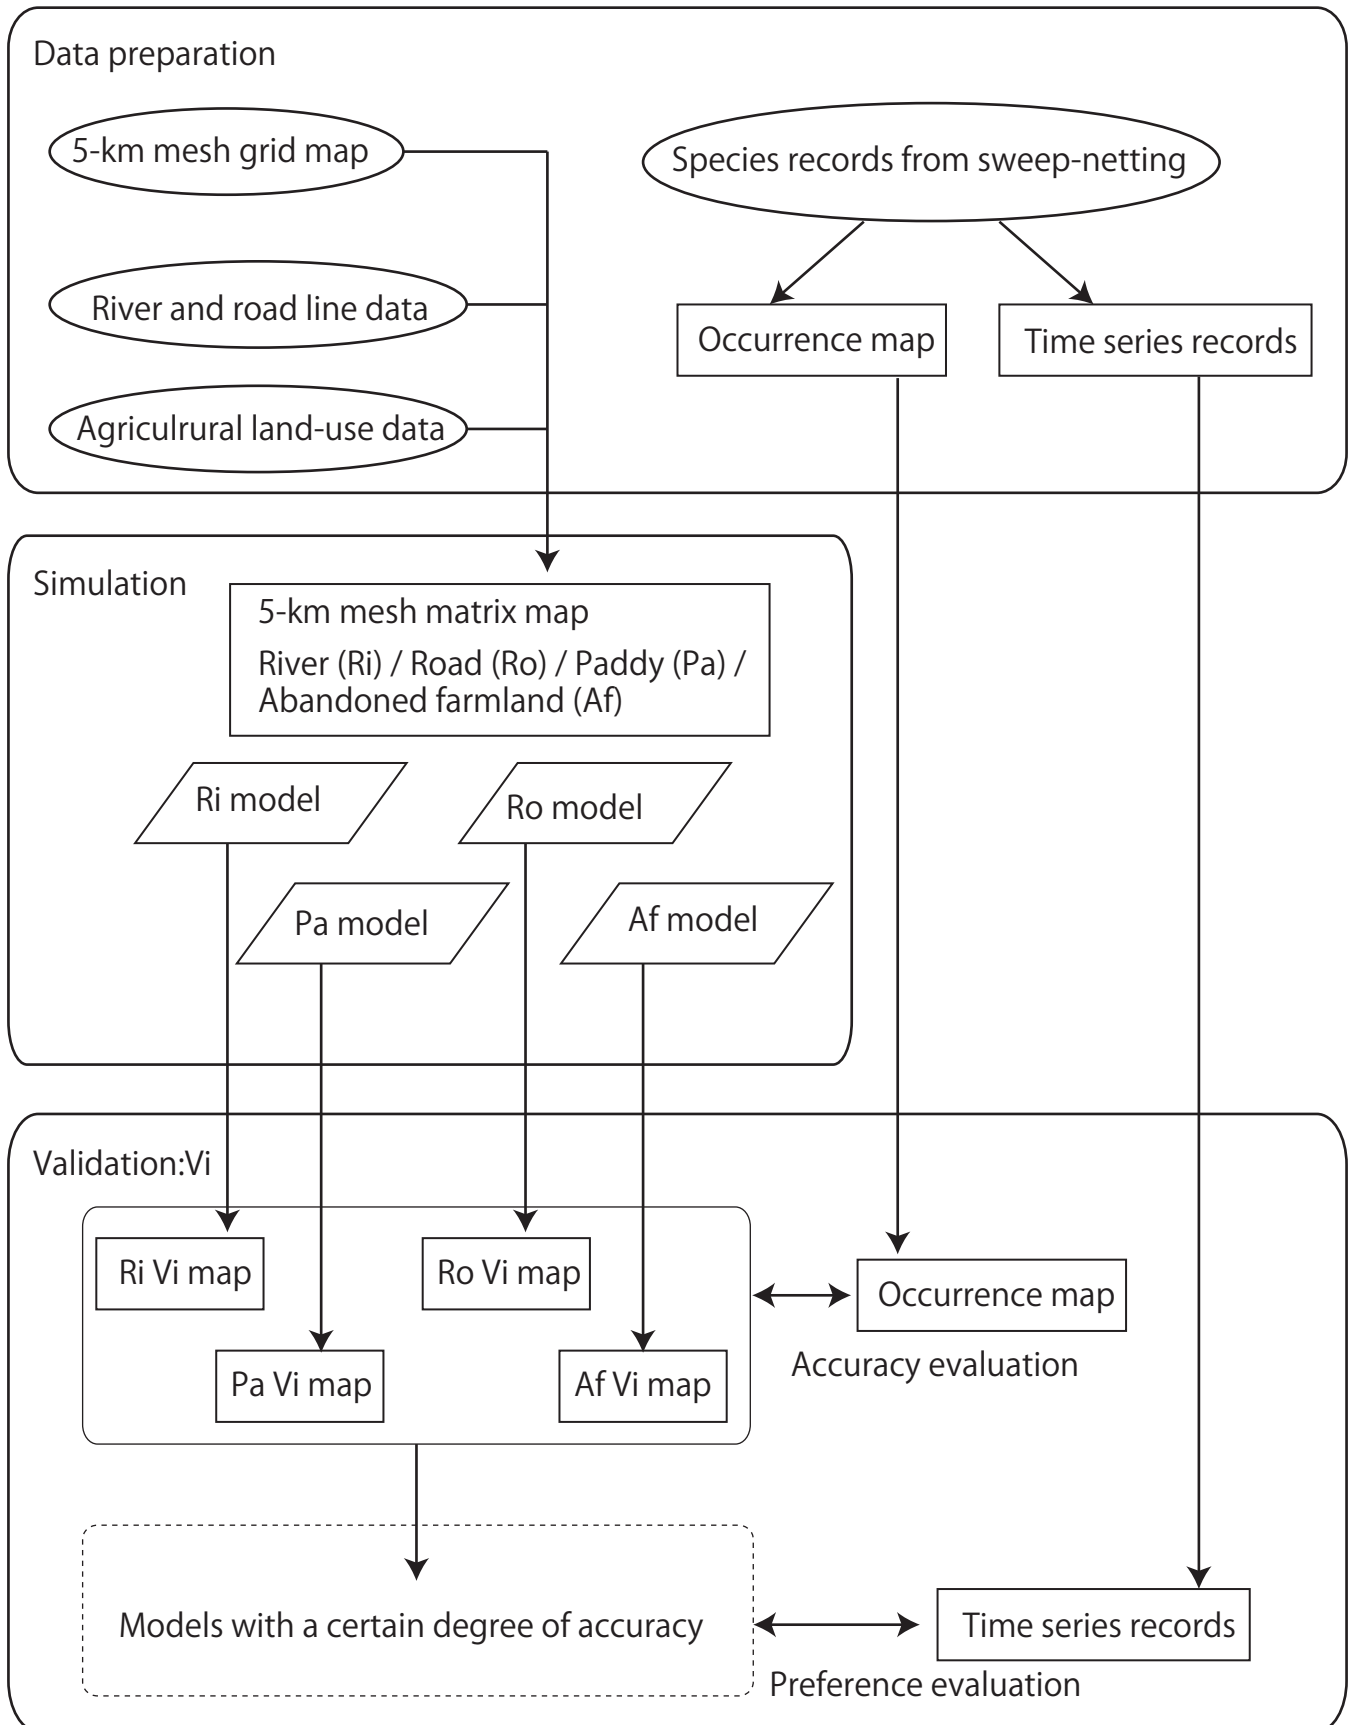

Supplement: 13280_2018_1026_MOESM1_ESM.pdf [file 13280_2018_1026_MOESM1_ESM.pdf]
